# Supplementary material
Source: Royal Society of Chemistry journal article supplement (doi:10.1039/d5em00809c)
Supplement: d5em00809c1.pdf [file d5em00809c1.pdf]

# Hydrophobic Model Systems for Oil Film Photooxidation: Part I: Sensitizer Effects on Hydrocarbon Photodegradation

## Supporting information

**Manoj P Rayaroth,<sup>a,b,\*</sup> Bin Wu,<sup>a,c</sup> Christoph Aeppli<sup>a,c</sup>**

<sup>a</sup> Bigelow Laboratory for Ocean Science, 60 Bigelow Drive, East Boothbay, ME, USA

<sup>b</sup> Department of Chemistry, GITAM School of Science, GITAM (Deemed to be)  
University, Visakhapatnam, India

<sup>c</sup> Colby College, 5750 Mayflower Hill Drive, Waterville, ME, 04901, USA

\* corresponding author

**Table S1:** Investigated petroleum hydrocarbons

| HCs               | Abbr. | GC/MS<br>SIM<br>mass | Typical Conc.<br>in DHW oil<br>(ug/g)* | Chemical structure                                                                    |
|-------------------|-------|----------------------|----------------------------------------|---------------------------------------------------------------------------------------|
| Butyl cyclohexane | BCH   | 83                   | n.d.                                   | 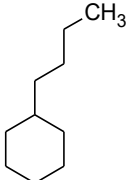   |
| Butyl Benzene     | BBz   | 91                   | n.d.                                   |    |
| Naphthalene       | NAP   | 128                  | 855 ug/g<br>0.66 umol/g                |    |
| Ethyl Naphthalene | ENAP  | 156                  | n.d.                                   |    |
| Anthracene        | ANT   | 178                  | 3.4 ug/g                               |    |
| Chrysene          | CHR   | 228                  | 23 ug/g                                |   |
| Pyrene            | PYR   | 202                  | 15 ug/g                                |  |
| Benzo[a]pyrene    | BaP   | 252                  | 1.4 ug/g                               |  |

\* Based on NIST standard reference material 2779

(<https://tsapps.nist.gov/srmext/certificates/2779.pdf>). *n.d.* = not determined.

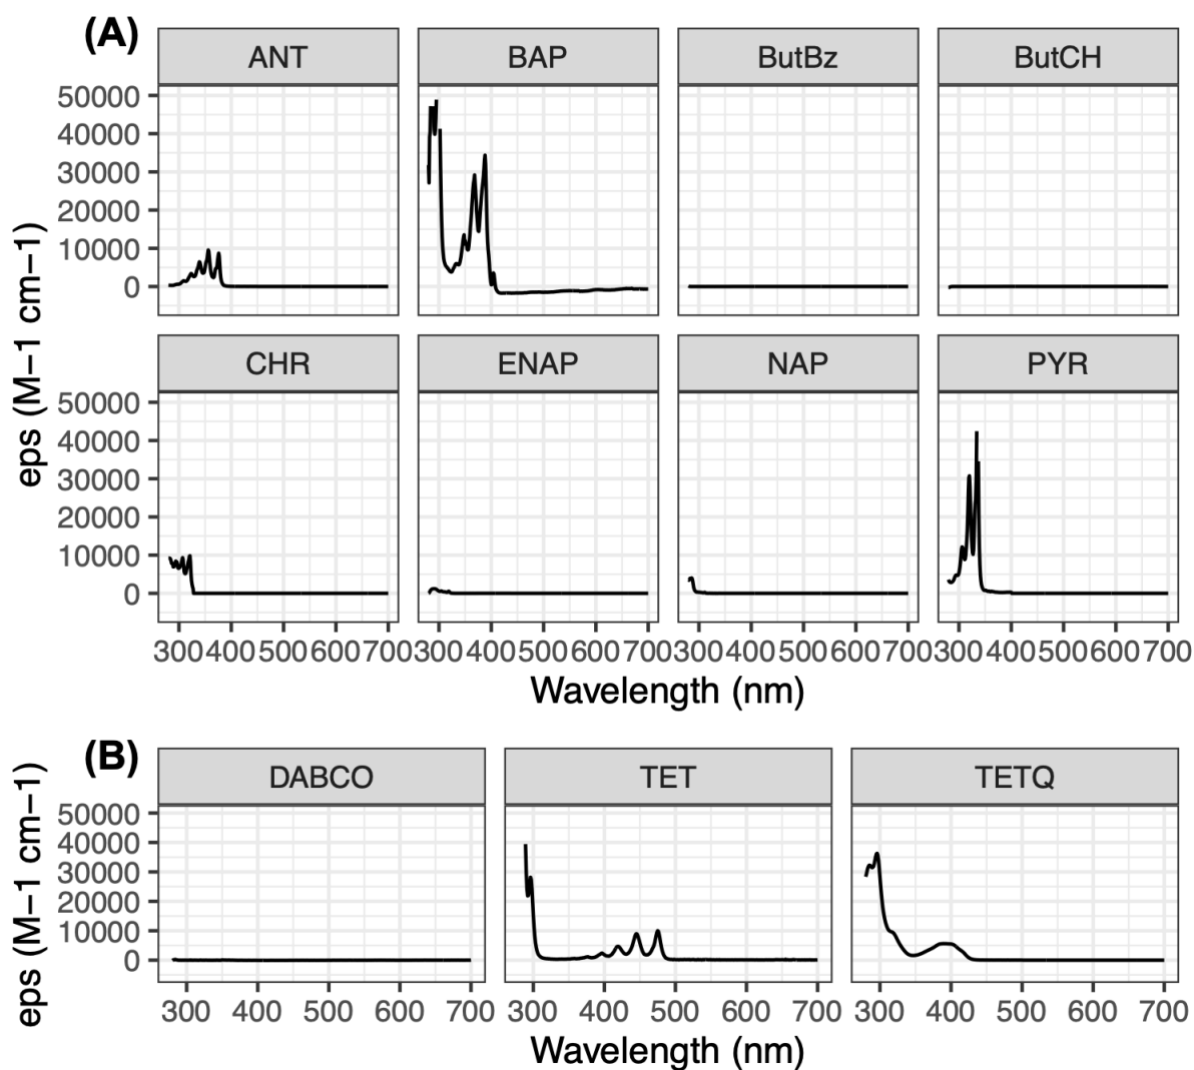

**Fig. S1.UV/VIS data:** Molar extinction coefficients (epsilon) of (A) target hydrocarbons; (B) sensitizers and scavengers in toluene.

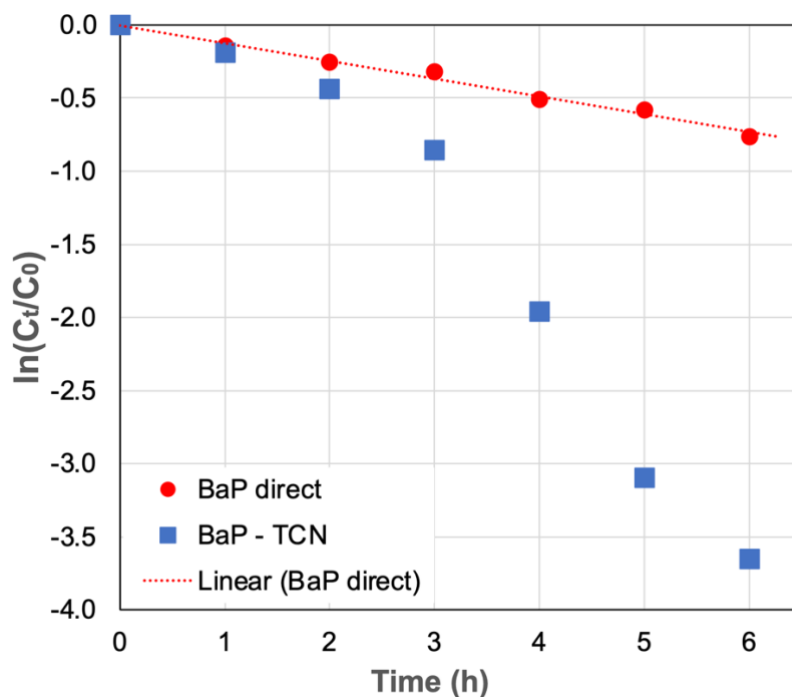

**Fig. S2. First-order transformation of BaP degradation data.** Direct photolysis of BaP exhibited near-linear behavior ( $R^2 = 0.988$ ), whereas TCN-sensitized degradation deviated substantially from linearity, indicating that a single first-order rate constant does not adequately describe the full irradiation period.

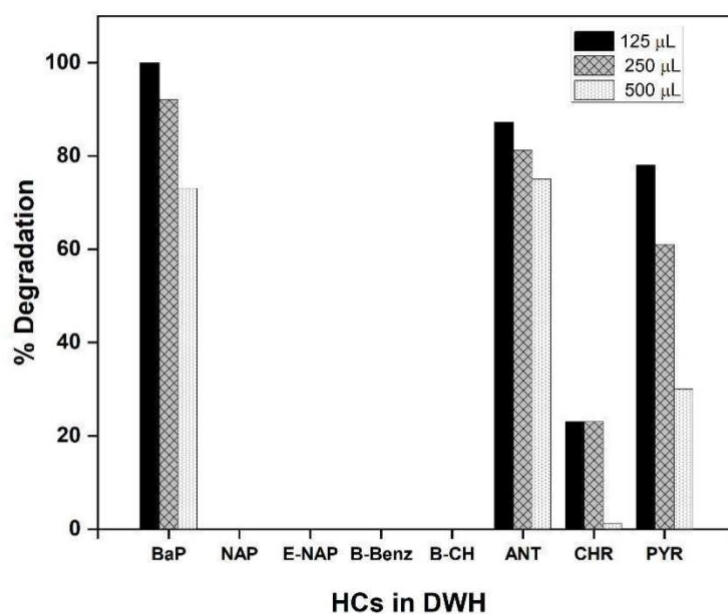

**Fig. S3.** Effect of DWH content on the photochemical transformation of PAHs; [HCs] = 5 μM, Time 24 hr

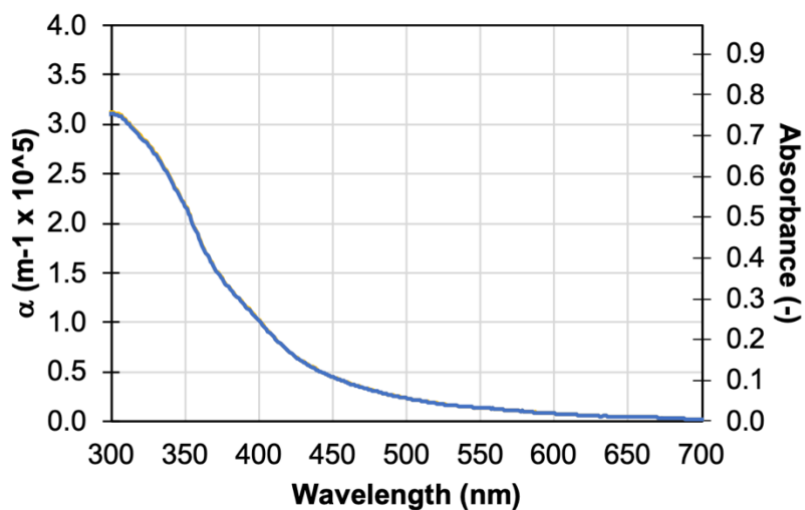

**Fig S4.** Absorbance of a DWH oil solution in toluene (right axis; concentration = 0.34 mg/mL) and derived neat-oil Napierian attenuation coefficients ( $\alpha$ ), calculated from absorbance using  $\alpha = 2.303 A * \rho / \text{conc.}$  ( $\rho = 0431.9 \text{ g/mL}$ ).

**Table S2:** Effect of different sensitizers on the degradation of BaP  
[sensitizers]<sub>0</sub> = 50 μM

| Sensitizer          | [BaP] <sub>0</sub> = 5 μM      |               |
|---------------------|--------------------------------|---------------|
|                     | C <sub>t</sub> /C <sub>0</sub> | % degradation |
| Direct              | 0.712                          | 28.8          |
| ANT                 | 0.636                          | 36.47         |
| Anthraquinone       | 0.021                          | 97.64         |
| Tetracene           | 0.198                          | 80.2          |
| Naphthacene Quinone | 0.227                          | 77.3          |

**Table S3:** Scavenger effect [BaP] = 5 μM, [TCN] = 100 μM, [Scavenger] = 50 μM;  
time 4 hr

| Experiments               | C <sub>t</sub> /C <sub>0</sub> | % degradation |
|---------------------------|--------------------------------|---------------|
| Direct                    | 0.712                          | 28.8          |
| Control (BaP/TCN)         | 0.198                          | 80.2          |
| No scavenger<br>(BaP/TCN) | 0.198                          | 80.2          |
| BaP/TCN/DHP               | 0.175                          | 82.5          |
| BaP/TCN/Penta diene       | 0.195                          | 80.5          |
| BaP/TCN/DABCO             | 0.667                          | 33.3          |
| BaP/TCN/IPA               | 0.205                          | 79.5          |

**Table S4:** Different [BaP] concentration; [TCN] = 100 μM; Time 4 hr

| Concentrations of BAP | C <sub>t</sub> /C <sub>0</sub> | % Degradation |
|-----------------------|--------------------------------|---------------|
| 1 μM                  | 0.08                           | 92.0          |
| 5 μM                  | 0.198                          | 80.2          |
| 50 μM                 | 0.525                          | 47.5          |
| 100 μM                | 0.706                          | 29.4          |

**Table S5:** Effect of TCN on the degradation of BaP; [BaP] = 5  $\mu$ M, Time 4 hr

| [TCN]              | Ct/C0 | % Degradation |
|--------------------|-------|---------------|
| 0 $\mu$ M (Direct) | 0.691 | 28.78         |
| 5 $\mu$ M          | 0.529 | 45.45         |
| 10 $\mu$ M         | 0.411 | 57.57         |
| 50 $\mu$ M         | 0.265 | 72.72         |
| 100 $\mu$ M        | 0.198 | 80.2          |
| 150 $\mu$ M        | 0.227 | 77.3          |

**Table S6:** Kinetics data; [BaP] = 5  $\mu$ M, [TCN] = 100  $\mu$ M, [TCQ] = 50  $\mu$ M

|      | TCN   | TCQ   |
|------|-------|-------|
|      | Ct/C0 | Ct/C0 |
| 0 hr | 1     | 1     |
| 1 hr | 0.828 | 0.835 |
| 2 hr | 0.644 | 0.506 |
| 3 hr | 0.425 | 0.380 |
| 4 hr | 0.241 | 0.184 |
| 5 hr | 0.045 | 0.084 |
| 6 hr | 0.026 | 0.046 |

**Table S7:** Estimation of TCN decay and TCQ formation using GC-MS

| Tetracene and Quinone formation | Tetracene (peak area) | Concentration of TCN calculated from peak area | Tetracene quinone (peak area) | Concentration of TCQ calculated from peak area |
|---------------------------------|-----------------------|------------------------------------------------|-------------------------------|------------------------------------------------|
| C0 = 50 $\mu$ M                 | 6629198               |                                                | 3847789                       |                                                |
| 1                               | 259960                | 1.96                                           | 2856414                       | 37.1                                           |
| 2                               | 138274                | 1.04                                           | 3137288                       | 40.8                                           |
| 3                               | 98537                 | 0.743                                          | 2879916                       | 37.4                                           |
| 4                               | 77436                 | 0.584                                          | 2528366                       | 32.9                                           |
| 5                               | 79461                 | 0.599                                          | 311738                        | 4.05                                           |
| 6                               | 69940                 | 0.528                                          | 268348                        | 3.49                                           |

**Table S8:** Kinetics of BaP direct photolysis; [BaP]= 5  $\mu$ M

| <b>Time</b> | <b>Ct/C0</b> |
|-------------|--------------|
| 0           | 1            |
| 1           | 0.864        |
| 2           | 0.773        |
| 3           | 0.727        |
| 4           | 0.602        |
| 5           | 0.559        |
| 6           | 0.466        |

**Table S9:** Degradation of HCs [HCs] = 5  $\mu$ M, [TCN] = 100  $\mu$ M, Time 4 hr

| <b>HCs</b>        | <b>Indirect</b> | <b>Direct</b> |
|-------------------|-----------------|---------------|
| BaP               | 75.0            | 38.0          |
| NAP               | 0               | 0             |
| Ethyl-NAP         | 0               | 0             |
| Butyl Benzene     | 0               | 0             |
| Butyl cyclohexane | 0               | 0             |
| Anthracene        | 27.0            | 6.0           |
| Chrysene          | 16.0            | 4.0           |
| Pyrene            | 52.0            | 15.0          |

**Table S10:** Degradation kinetics (Ct/C0) of HCs in their mix;  
[HCs] = 5  $\mu$ M, [TCN] = 100  $\mu$ M

|                    | <b>ANT</b> | <b>BaP</b> | <b>BCH</b> | <b>BB</b> | <b>CHR</b> | <b>ENA</b> | <b>NAP</b> | <b>PYR</b> |
|--------------------|------------|------------|------------|-----------|------------|------------|------------|------------|
| MIX 5 $\mu$ M 0 hr | 1.00       | 1.00       | 1.00       | 1.00      | 1.00       | 1.00       | 1.00       | 1.00       |
| MIX 5 $\mu$ M 1 hr | 1.19       | 1.11       | 1.03       | 1.07      | 1.25       | 1.11       | 1.01       | 0.94       |
| MIX 5 $\mu$ M 2 hr | 1.13       | 0.80       | 0.96       | 1.02      | 1.19       | 1.13       | 1.00       | 0.87       |
| MIX 5 $\mu$ M 3 hr | 1.00       | 0.53       | 0.90       | 0.98      | 1.17       | 1.14       | 0.98       | 0.80       |
| MIX 5 $\mu$ M 4 hr | 0.78       | 0.19       | 1.00       | 1.06      | 1.11       | 1.17       | 1.05       | 0.63       |
| MIX 5 $\mu$ M 5 hr | 0.52       | 0.06       | 0.78       | 0.83      | 0.87       | 0.93       | 0.85       | 0.35       |
| MIX 5 $\mu$ M 6 hr | 0.47       | 0.02       | 0.65       | 0.76      | 0.81       | 0.94       | 0.81       | 0.23       |

**Table S11:** Degradation kinetics (Ct/C0) of HCs in dilute DWH crude oil dissolved in toluene; [HCs] = 5 µM, [DWH] = 370 mg crude oil per L toluene.

|            | <b>ANT</b> | <b>BaP</b> | <b>BBz</b> | <b>BCH</b> | <b>CHR</b> | <b>ENAP</b> | <b>PYR</b> | <b>NAP</b> |
|------------|------------|------------|------------|------------|------------|-------------|------------|------------|
| Mix DWH 0h | 1.00       | 1.00       | 1.00       | 1.00       | 1.00       | 1.00        | 1.00       | 1.00       |
| DWH 4h     | 1.00       | 0.96       | 0.96       | 0.90       | 0.96       | 1.00        | 0.96       | 0.96       |
| DWH 8h     | 0.40       | 0.30       | 1.13       | 1.15       | 0.90       | 1.08        | 0.64       | 1.06       |
| DWH 12h    | 0.33       | 0.20       | 0.98       | 0.95       | 0.87       | 1.03        | 0.58       | 0.97       |
| DWH 16h    | 0.13       | 0.03       | 0.95       | 0.88       | 0.67       | 1.03        | 0.22       | 0.98       |
| DWH 24h    | 0.11       | 0.02       | 0.88       | 0.85       | 0.40       | 0.97        | 0.09       | 0.89       |
| DWH 48h    | 0.10       | 0.01       | 1.14       | 1.29       | 0.32       | 0.99        | 0.04       | 1.02       |

**Table S12:** Scavenging study of HCs in dilute DWH crude oil with added scavengers. [HCs] = 5 µM, [DWH] = 370 mg crude oil per L toluene. [Scavengers] = 50 µM.

|                              | <b>ANT</b> | <b>BaP</b> | <b>BBz</b> | <b>BCH</b> | <b>CHR</b> | <b>ENAP</b> | <b>PYR</b> | <b>NAP</b> |
|------------------------------|------------|------------|------------|------------|------------|-------------|------------|------------|
| DWH Mix 24 hr                | 87.27      | 97.53      | -3.08      | -11.95     | 36.58      | 3.60        | 81.02      | 3.05       |
| DWH Mix IPA 24 hr            | 85.03      | 97.72      | 3.07       | 3.98       | 30.40      | -4.13       | 77.19      | 2.77       |
| DWH Mix DABCO 24 hr          | 78.28      | 75.09      | 2.54       | -4.25      | 13.07      | 0.06        | 46.18      | 0.71       |
| DWH Mix Penta diene<br>24 hr | 83.61      | 96.07      | 3.90       | 3.26       | 28.99      | 4.91        | 73.21      | 9.12       |
